# Supplementary material for: Two Grey–White Matter Circuits Separate Borderline Personality Disorder From Controls and Mediate the Relationship Between Specific Childhood Traumas and Symptoms. A mCCA+jICA and Random Forest Approach
Source: Preprints.org preprint supplement (doi:10.20944/preprints202302.0089.v1), 2023-02-06

**OTHER ICs**

**ICGM1**

| **Area** | **Brodmann Area** | **volume (cc)** | **random effects: Max Value (x, y, z)** |
| --- | --- | --- | --- |
| **Inferior Temporal Gyrus** | **20, 21** | **3.8/1.3** | **11.7 (-40, -13, -30)/8.1 (39, -13, -30)** |
| **Fusiform Gyrus** | **20, 36, 37** | **3.1/1.3** | **10.4 (-40, -19, -24)/8.8 (42, -27, -18)** |
| **Sub-Gyral** | **6, 20** | **3.4/3.1** | **9.8 (-42, -21, -22)/8.7 (42, -23, -19)** |
| **Uncus** | **20, 28, 36, 38** | **1.7/2.0** | **9.7 (-37, -13, -27)/7.7 (36, -10, -32)** |
| ***** | ***** | **0.1/0.1** | **4.0 (-4, -84, -26)/4.9 (22, 1, -37)** |
| **Precuneus** | **7, 31** | **1.1/0.9** | **9.3 (-15, -59, 22)/6.6 (15, -58, 32)** |
| **Middle Temporal Gyrus** | **20, 21, 37, 38, 39** | **7.9/4.0** | **7.2 (-39, -7, -30)/6.0 (50, -56, 10)** |
| **Superior Temporal Gyrus** | **21, 22, 38, 39** | **4.7/2.9** | **6.2 (-45, -53, 25)/7.1 (48, -53, 10)** |
| **Parahippocampal Gyrus** | **30, 36** | **1.1/0.9** | **7.1 (-39, -29, -19)/6.1 (39, -29, -20)** |
| **Middle Occipital Gyrus** | **18, 19** | **0.0/1.9** | **-999.0 (0, 0, 0)/6.7 (39, -72, 16)** |
| **Pyramis** | ***** | **0.6/0.0** | **6.5 (-10, -81, -24)/-999.0 (0, 0, 0)** |
| **Posterior Cingulate** | **30, 31** | **1.1/0.0** | **6.2 (-12, -59, 15)/-999.0 (0, 0, 0)** |
| **Extra-Nuclear** | ***** | **0.4/0.1** | **6.1 (-21, -55, 8)/3.6 (21, -54, 19)** |
| **Uvula** | ***** | **0.6/0.0** | **6.0 (-13, -78, -24)/-999.0 (0, 0, 0)** |
| **Angular Gyrus** | ***** | **0.0/0.1** | **-999.0 (0, 0, 0)/5.8 (37, -55, 37)** |
| **Declive** | ***** | **0.6/0.0** | **5.7 (-7, -81, -21)/-999.0 (0, 0, 0)** |
| **Inferior Parietal Lobule** | **40** | **0.4/0.1** | **5.5 (-39, -36, 38)/4.3 (39, -59, 39)** |
| **Supramarginal Gyrus** | ***** | **0.4/0.1** | **5.3 (-48, -53, 22)/4.4 (37, -52, 34)** |
| **Cingulate Gyrus** | **31** | **0.0/0.1** | **-999.0 (0, 0, 0)/5.1 (16, -55, 29)** |
| **Lingual Gyrus** | **18, 19** | **0.4/0.3** | **4.7 (-19, -55, 4)/5.0 (18, -73, 0)** |
| **Postcentral Gyrus** | **3** | **0.3/0.0** | **4.7 (-55, -18, 23)/-999.0 (0, 0, 0)** |
| **Middle Frontal Gyrus** | ***** | **0.0/0.1** | **-999.0 (0, 0, 0)/4.6 (24, -5, 50)** |
| **Cuneus** | **18** | **0.1/0.1** | **4.4 (-7, -86, 20)/3.8 (10, -88, 20)** |
| **Anterior Cingulate** | **24** | **0.2/0.1** | **3.9 (-1, 33, -2)/4.3 (1, 32, -4)** |
| **Precentral Gyrus** | **6, 9** | **0.0/0.1** | **-999.0 (0, 0, 0)/4.2 (53, -2, 10)** |
| **Superior Frontal Gyrus** | **8** | **0.0/0.1** | **-999.0 (0, 0, 0)/3.6 (22, 17, 45)** |

**ICGM3**

| **Area** | **Brodmann Area** | **volume (cc)** | **random effects: Max Value (x, y, z)** |
| --- | --- | --- | --- |
| **Middle Temporal Gyrus** | **19, 20, 21, 39** | **2.6/1.7** | **9.1 (-48, -41, 5)/6.0 (43, -56, 22)** |
| **Angular Gyrus** | ***** | **0.1/0.4** | **4.5 (-42, -70, 30)/8.8 (43, -57, 30)** |
| **Cuneus** | **7, 18, 19** | **1.3/1.5** | **6.8 (-10, -74, 29)/8.0 (16, -71, 33)** |
| **Superior Temporal Gyrus** | **21, 22, 39, 41** | **0.3/2.3** | **5.6 (-52, -40, 6)/7.8 (46, -37, 9)** |
| **Middle Occipital Gyrus** | **18** | **1.4/0.3** | **7.8 (-22, -85, 17)/4.4 (24, -85, 21)** |
| **Precuneus** | **7, 31** | **1.1/2.1** | **5.7 (-13, -71, 28)/7.2 (16, -68, 30)** |
| **Declive** | ***** | **1.2/1.9** | **7.0 (-33, -57, -11)/6.1 (27, -78, -15)** |
| **Cingulate Gyrus** | **24, 31, 32** | **1.2/0.6** | **6.9 (-4, -50, 26)/5.2 (13, -27, 39)** |
| **Inferior Semi-Lunar Lobule** | ***** | **0.3/0.2** | **5.1 (-3, -59, -42)/6.4 (1, -59, -36)** |
| **Sub-Gyral** | **7, 40** | **1.5/1.2** | **6.3 (-48, -36, 3)/5.6 (56, -47, -6)** |
| **Posterior Cingulate** | **23, 30, 31** | **1.2/0.1** | **6.2 (-4, -50, 22)/4.3 (3, -47, 23)** |
| **Medial Frontal Gyrus** | **10, 11** | **1.7/0.4** | **6.1 (-4, 47, -14)/4.6 (12, 48, 3)** |
| **Fusiform Gyrus** | **19, 20, 37** | **1.1/0.8** | **5.4 (-49, -26, -23)/5.9 (21, -81, -14)** |
| **Cerebellar Tonsil** | ***** | **0.3/0.4** | **5.1 (-1, -59, -34)/5.9 (3, -57, -32)** |
| **Lateral Ventricle** | ***** | **0.3/0.1** | **5.9 (-25, -8, -19)/4.6 (25, -7, -20)** |
| ***** | ***** | **0.1/0.2** | **3.5 (-34, -50, -13)/4.7 (1, 41, -16)** |
| **Lingual Gyrus** | **18** | **0.3/1.5** | **5.1 (-19, -70, -2)/5.7 (16, -82, -12)** |
| **Inferior Frontal Gyrus** | **9** | **0.3/0.0** | **5.7 (-39, 6, 27)/-999.0 (0, 0, 0)** |
| **Precentral Gyrus** | **6, 9** | **0.1/0.1** | **4.1 (-36, 3, 27)/5.5 (36, 22, 35)** |
| **Parahippocampal Gyrus** | **28, 34** | **2.2/0.3** | **5.5 (-22, -11, -18)/4.3 (25, -4, -23)** |
| **Nodule** | ***** | **0.1/0.5** | **4.0 (0, -51, -30)/5.5 (3, -54, -30)** |
| **Supramarginal Gyrus** | ***** | **0.0/0.3** | **-999.0 (0, 0, 0)/5.0 (48, -57, 33)** |
| **Uncus** | **28** | **0.5/0.3** | **4.9 (-25, -5, -21)/4.2 (28, -4, -19)** |
| **Inferior Temporal Gyrus** | **20, 37** | **0.6/0.2** | **4.8 (-59, -36, -15)/4.2 (56, -53, -11)** |
| **Uvula of Vermis** | ***** | **0.0/0.1** | **-999.0 (0, 0, 0)/4.8 (1, -61, -34)** |
| **Superior Parietal Lobule** | **7** | **0.2/0.2** | **4.5 (-33, -58, 54)/4.7 (25, -52, 45)** |
| **Fourth Ventricle** | ***** | **0.0/0.1** | **-999.0 (0, 0, 0)/4.7 (1, -52, -26)** |
| **Culmen** | ***** | **0.3/0.0** | **4.3 (-28, -53, -15)/-999.0 (0, 0, 0)** |
| **Extra-Nuclear** | ***** | **0.1/0.0** | **4.2 (-21, -36, 7)/-999.0 (0, 0, 0)** |
| **Inferior Occipital Gyrus** | **19** | **0.1/0.1** | **4.2 (-39, -73, -5)/3.5 (30, -84, -12)** |
| **Superior Frontal Gyrus** | ***** | **0.1/0.1** | **3.8 (-24, 54, -5)/4.2 (19, 56, -12)** |
| **Anterior Cingulate** | **24, 32** | **0.1/0.2** | **4.0 (-7, 25, 25)/3.8 (4, 30, 12)** |
| **Middle Frontal Gyrus** | **8** | **0.1/0.1** | **3.8 (-28, 47, 10)/3.9 (34, 19, 38)** |
| **Uvula** | ***** | **0.0/0.1** | **-999.0 (0, 0, 0)/3.8 (6, -60, -32)** |
| **Pyramis** | ***** | **0.1/0.0** | **3.5 (-34, -66, -31)/-999.0 (0, 0, 0)** |

**ICGM4**

| **Area** | **Brodmann Area** | **volume (cc)** | **random effects: Max Value (x, y, z)** |
| --- | --- | --- | --- |
| **Thalamus** | ***** | **7.0/6.2** | **19.7 (-10, -20, 9)/14.9 (12, -18, 9)** |
| **Extra-Nuclear** | ***** | **1.3/0.7** | **9.6 (-1, -17, 9)/7.7 (3, -19, 5)** |
| **Supramarginal Gyrus** | **40** | **0.3/0.8** | **5.2 (-36, -45, 37)/8.7 (43, -54, 29)** |
| **Cingulate Gyrus** | **23, 24, 31, 32** | **3.5/2.8** | **8.3 (-9, -43, 37)/6.9 (10, -45, 38)** |
| **Superior Temporal Gyrus** | **38, 39** | **0.0/0.6** | **-999.0 (0, 0, 0)/7.8 (46, -57, 29)** |
| **Cerebellar Tonsil** | ***** | **0.5/2.4** | **5.5 (-40, -45, -32)/7.6 (42, -47, -33)** |
| **Middle Frontal Gyrus** | **6, 8, 9** | **1.2/1.0** | **7.2 (-24, 21, 39)/5.4 (42, 1, 43)** |
| **Postcentral Gyrus** | **2, 3, 4** | **1.0/0.0** | **7.2 (-52, -22, 31)/-999.0 (0, 0, 0)** |
| **Precuneus** | **7, 31** | **1.9/0.4** | **7.1 (-7, -48, 30)/5.1 (13, -45, 35)** |
| **Superior Parietal Lobule** | **7** | **0.3/0.1** | **7.0 (-25, -52, 45)/4.1 (33, -47, 51)** |
| **Lentiform Nucleus** | ***** | **0.8/1.4** | **5.1 (-28, -11, 3)/6.7 (28, -9, 5)** |
| **Culmen** | ***** | **0.4/0.9** | **4.6 (-42, -48, -29)/6.7 (43, -47, -29)** |
| **Sub-Gyral** | **6, 8** | **2.2/0.3** | **6.2 (-33, -42, 37)/4.4 (28, -2, 53)** |
| ***** | ***** | **0.1/0.2** | **4.1 (-4, -83, -22)/4.8 (33, -50, -14)** |
| **Third Ventricle** | ***** | **0.2/0.3** | **5.9 (-1, -15, 1)/6.0 (1, -12, 1)** |
| **Angular Gyrus** | ***** | **0.0/0.4** | **-999.0 (0, 0, 0)/5.9 (43, -57, 32)** |
| **Inferior Parietal Lobule** | **40** | **1.8/0.4** | **5.6 (-36, -42, 39)/4.6 (50, -36, 40)** |
| **Declive** | ***** | **0.3/0.4** | **5.5 (-7, -83, -20)/4.3 (33, -55, -14)** |
| **Middle Temporal Gyrus** | **19, 39** | **0.1/0.3** | **3.6 (-40, -58, 15)/5.5 (43, -60, 29)** |
| **Tuber** | ***** | **0.1/0.8** | **3.7 (-49, -52, -29)/5.5 (49, -54, -29)** |
| **Lateral Ventricle** | ***** | **0.4/0.1** | **5.4 (-7, -20, 18)/3.5 (3, -9, 14)** |
| **Posterior Cingulate** | **23, 30** | **0.4/0.3** | **5.0 (-3, -48, 23)/4.7 (4, -50, 25)** |
| **Superior Frontal Gyrus** | **6, 8, 9, 10** | **0.5/0.1** | **5.0 (-22, 10, 48)/3.5 (24, 41, 32)** |
| **Paracentral Lobule** | **5** | **0.2/0.0** | **4.8 (-1, -41, 56)/-999.0 (0, 0, 0)** |
| **Precentral Gyrus** | **6** | **0.1/0.1** | **3.8 (-46, -21, 37)/4.6 (46, 1, 43)** |
| **Inferior Temporal Gyrus** | **20** | **0.2/0.0** | **4.4 (-53, -29, -21)/-999.0 (0, 0, 0)** |
| **Insula** | ***** | **0.2/0.0** | **4.2 (-45, -35, 21)/-999.0 (0, 0, 0)** |
| **Pyramis** | ***** | **0.1/0.0** | **4.2 (-7, -86, -22)/-999.0 (0, 0, 0)** |
| **Fusiform Gyrus** | **20, 37** | **0.1/0.1** | **3.9 (-50, -32, -20)/4.0 (33, -46, -13)** |
| **Parahippocampal Gyrus** | **30** | **0.1/0.0** | **3.8 (-15, -48, 4)/-999.0 (0, 0, 0)** |
| **Inferior Semi-Lunar Lobule** | ***** | **0.0/0.1** | **-999.0 (0, 0, 0)/3.8 (15, -69, -41)** |
| **Lingual Gyrus** | ***** | **0.1/0.0** | **3.6 (-27, -73, -4)/-999.0 (0, 0, 0)** |

**ICGM5**

| **Area** | **Brodmann Area** | **volume (cc)** | **random effects: Max Value (x, y, z)** |
| --- | --- | --- | --- |
| **Inferior Semi-Lunar Lobule** | ***** | **5.8/4.9** | **11.2 (0, -57, -38)/10.2 (3, -60, -37)** |
| ***** | ***** | **0.1/0.3** | **3.8 (-12, -67, -4)/6.8 (1, -54, -26)** |
| **Cerebellar Tonsil** | ***** | **5.5/4.2** | **10.3 (0, -54, -35)/9.9 (3, -57, -35)** |
| **Uvula of Vermis** | ***** | **0.3/0.3** | **9.4 (0, -64, -33)/8.7 (3, -60, -32)** |
| **Fourth Ventricle** | ***** | **0.1/0.2** | **4.0 (-1, -52, -24)/9.3 (0, -53, -31)** |
| **Nodule** | ***** | **0.6/0.7** | **8.2 (-1, -55, -29)/8.7 (3, -55, -30)** |
| **Uvula** | ***** | **1.5/1.9** | **7.8 (-3, -67, -33)/7.4 (7, -69, -33)** |
| **Inferior Frontal Gyrus** | **9** | **0.5/0.3** | **7.3 (-37, 7, 27)/5.5 (40, 10, 26)** |
| **Pyramis of Vermis** | ***** | **0.3/0.1** | **7.2 (0, -70, -28)/6.5 (3, -73, -28)** |
| **Middle Frontal Gyrus** | **6, 9** | **1.1/0.2** | **6.5 (-36, 12, 27)/7.1 (37, 13, 26)** |
| **Pyramis** | ***** | **3.5/2.6** | **7.0 (-15, -79, -33)/6.9 (21, -77, -34)** |
| **Tuber of Vermis** | ***** | **0.3/0.1** | **5.8 (-3, -70, -26)/6.6 (3, -70, -26)** |
| **Uncus** | **28, 34, 36, 38** | **1.0/1.5** | **6.0 (-22, -5, -21)/6.4 (21, -3, -24)** |
| **Parahippocampal Gyrus** | **28, 34, 35** | **2.0/1.6** | **6.0 (-28, -14, -17)/5.3 (30, -14, -17)** |
| **Tuber** | ***** | **1.4/0.6** | **5.8 (-22, -82, -30)/5.6 (19, -83, -30)** |
| **Superior Temporal Gyrus** | **22, 38, 39** | **0.5/0.8** | **4.9 (-28, 11, -35)/5.8 (42, -56, 17)** |
| **Sub-Gyral** | ***** | **0.6/1.2** | **5.4 (-40, 7, 25)/5.8 (34, 16, 25)** |
| **Precuneus** | **31** | **0.3/0.3** | **4.2 (-13, -71, 28)/5.1 (28, -58, 36)** |
| **Lateral Ventricle** | ***** | **0.1/0.2** | **4.4 (-28, -7, -21)/5.0 (25, -8, -20)** |
| **Declive** | ***** | **2.2/2.3** | **5.0 (0, -65, -14)/4.6 (10, -83, -21)** |
| **Middle Temporal Gyrus** | **19, 38, 39** | **0.4/0.4** | **4.6 (-43, -59, 14)/4.9 (45, -59, 17)** |
| **Lingual Gyrus** | **17, 18** | **1.8/0.2** | **4.9 (-4, -91, -7)/3.9 (12, -73, -3)** |
| **Culmen** | ***** | **0.9/0.9** | **4.6 (-9, -68, -10)/4.9 (1, -48, -4)** |
| **Precentral Gyrus** | **4, 6** | **0.4/0.0** | **4.8 (-34, 4, 27)/-999.0 (0, 0, 0)** |
| **Middle Occipital Gyrus** | ***** | **0.3/0.1** | **4.6 (-36, -73, -8)/4.1 (31, -78, 14)** |
| **Inferior Temporal Gyrus** | **19** | **0.1/0.0** | **4.5 (-49, -58, -2)/-999.0 (0, 0, 0)** |
| **Declive of Vermis** | ***** | **0.1/0.2** | **3.8 (0, -71, -14)/4.4 (0, -67, -21)** |
| **Fusiform Gyrus** | **19** | **0.3/0.0** | **4.2 (-34, -73, -11)/-999.0 (0, 0, 0)** |
| **Cerebellar Lingual** | ***** | **0.1/0.1** | **3.8 (-3, -44, -12)/3.9 (0, -47, -15)** |
| **Inferior Parietal Lobule** | ***** | **0.0/0.1** | **-999.0 (0, 0, 0)/3.8 (37, -43, 39)** |
| **Cuneus** | **7, 18** | **0.2/0.0** | **3.7 (-13, -73, 33)/-999.0 (0, 0, 0)** |
| **Superior Frontal Gyrus** | ***** | **0.1/0.0** | **3.6 (-31, -9, 63)/-999.0 (0, 0, 0)** |

**ICGM7**

| **Area** | **Brodmann Area** | **volume (cc)** | **random effects: Max Value (x, y, z)** |
| --- | --- | --- | --- |
| **Fusiform Gyrus** | **20, 36, 37** | **1.5/1.1** | **6.4 (-42, -31, -17)/7.4 (42, -30, -17)** |
| **Caudate** | ***** | **1.0/1.7** | **5.2 (-12, 15, 2)/7.0 (13, 18, 1)** |
| **Superior Temporal Gyrus** | **38, 41** | **1.6/0.6** | **6.4 (-40, -31, 14)/4.8 (27, 11, -22)** |
| **Sub-Gyral** | **6, 20** | **2.0/1.5** | **5.5 (-39, 40, 4)/6.2 (42, -23, -20)** |
| **Extra-Nuclear** | **47** | **0.3/1.0** | **3.8 (-19, -52, 7)/6.0 (24, -53, 8)** |
| **Thalamus** | ***** | **0.6/0.5** | **5.3 (-3, -10, 6)/5.8 (1, -10, 5)** |
| **Inferior Parietal Lobule** | **40** | **0.1/0.3** | **3.7 (-46, -37, 23)/5.7 (36, -51, 38)** |
| ***** | ***** | **0.2/0.4** | **3.7 (-16, 5, -18)/4.3 (1, 27, -18)** |
| **Anterior Cingulate** | **24, 32, 33** | **2.6/2.8** | **4.9 (-4, 33, 20)/5.7 (7, 42, -2)** |
| **Middle Frontal Gyrus** | **6, 9, 10, 46, 47** | **2.8/1.5** | **5.6 (-39, 4, 41)/5.0 (45, 41, -3)** |
| **Insula** | **13** | **2.6/1.3** | **5.5 (-42, -28, 17)/4.9 (37, -24, 18)** |
| **Parahippocampal Gyrus** | **30, 36** | **0.1/0.5** | **5.1 (-39, -33, -20)/5.5 (39, -32, -20)** |
| **Inferior Frontal Gyrus** | **10, 46, 47** | **2.6/3.7** | **5.1 (-16, 9, -17)/5.4 (21, 8, -18)** |
| **Cuneus** | **23** | **0.4/0.1** | **5.4 (-18, -68, 9)/4.1 (21, -67, 10)** |
| **Middle Temporal Gyrus** | **21, 39** | **1.4/1.8** | **5.2 (-61, -37, -6)/5.1 (61, -35, -8)** |
| **Medial Frontal Gyrus** | **9, 10, 11, 25** | **1.9/3.1** | **5.1 (-1, 28, -15)/5.2 (3, 47, 13)** |
| **Transverse Temporal Gyrus** | **41** | **0.3/0.0** | **5.1 (-43, -31, 11)/-999.0 (0, 0, 0)** |
| **Posterior Cingulate** | **30** | **0.2/0.4** | **4.9 (-21, -65, 9)/5.1 (22, -62, 10)** |
| **Declive** | ***** | **0.6/0.0** | **4.9 (-46, -55, -20)/-999.0 (0, 0, 0)** |
| **Superior Frontal Gyrus** | **9** | **0.7/0.1** | **4.9 (-24, 35, 30)/4.3 (27, 45, 21)** |
| **Uncus** | **20, 28** | **0.1/0.1** | **4.9 (-25, 9, -22)/4.2 (24, 6, -20)** |
| **Inferior Temporal Gyrus** | **20** | **0.1/0.3** | **3.6 (-55, -16, -22)/4.7 (39, -13, -27)** |
| **Lateral Ventricle** | ***** | **0.1/0.1** | **4.5 (-1, -7, 3)/4.7 (27, -51, 8)** |
| **Culmen** | ***** | **0.6/0.0** | **4.5 (-46, -51, -21)/-999.0 (0, 0, 0)** |
| **Middle Occipital Gyrus** | **19** | **0.1/0.1** | **3.9 (-30, -79, 21)/4.5 (43, -66, -4)** |
| **Lentiform Nucleus** | ***** | **0.1/0.1** | **4.2 (-15, 14, -5)/4.3 (16, 13, -3)** |
| **Supramarginal Gyrus** | ***** | **0.0/0.1** | **-999.0 (0, 0, 0)/4.3 (37, -48, 36)** |
| **Precentral Gyrus** | **6, 9** | **0.1/0.3** | **3.6 (-53, 15, 6)/4.3 (40, 8, 37)** |
| **Cingulate Gyrus** | **32** | **1.2/0.1** | **4.3 (-3, 23, 28)/3.6 (3, 29, 28)** |
| **Claustrum** | ***** | **0.1/0.0** | **4.2 (-37, -17, 2)/-999.0 (0, 0, 0)** |
| **Subcallosal Gyrus** | ***** | **0.1/0.3** | **4.1 (-13, 8, -14)/4.0 (3, 24, -13)** |
| **Third Ventricle** | ***** | **0.0/0.1** | **-999.0 (0, 0, 0)/4.0 (0, -10, 1)** |
| **Uvula** | ***** | **0.1/0.0** | **3.9 (-22, -76, -26)/-999.0 (0, 0, 0)** |
| **Angular Gyrus** | ***** | **0.0/0.1** | **-999.0 (0, 0, 0)/3.9 (37, -54, 36)** |
| **Tuber** | ***** | **0.1/0.0** | **3.9 (-49, -48, -22)/-999.0 (0, 0, 0)** |
| **Pyramis** | ***** | **0.1/0.0** | **3.8 (-27, -74, -28)/-999.0 (0, 0, 0)** |
| **Lingual Gyrus** | ***** | **0.0/0.1** | **-999.0 (0, 0, 0)/3.8 (27, -85, -3)** |
| **Inferior Occipital Gyrus** | ***** | **0.1/0.0** | **3.8 (-40, -69, -3)/-999.0 (0, 0, 0)** |
| **Rectal Gyrus** | **11** | **0.0/0.1** | **-999.0 (0, 0, 0)/3.5 (4, 40, -23)** |

**ICGM8**

| **Area** | **Brodmann Area** | **volume (cc)** | **random effects: Max Value (x, y, z)** |
| --- | --- | --- | --- |
| **Supramarginal Gyrus** | **40** | **0.6/0.3** | **9.6 (-40, -54, 26)/4.0 (50, -48, 23)** |
| **Superior Temporal Gyrus** | **13, 22, 39, 41** | **1.9/3.0** | **8.8 (-40, -57, 29)/8.8 (48, -42, 15)** |
| **Extra-Nuclear** | ***** | **2.0/1.9** | **7.2 (-1, -16, 6)/6.7 (15, 17, -3)** |
| **Caudate** | ***** | **2.4/2.9** | **7.6 (-13, 4, 15)/8.2 (13, 18, 1)** |
| **Middle Temporal Gyrus** | **21, 22, 39** | **1.0/0.2** | **8.1 (-48, -45, 9)/4.9 (48, -42, 9)** |
| **Thalamus** | ***** | **2.6/1.3** | **8.1 (-4, -13, 6)/7.7 (3, -9, 5)** |
| **Lentiform Nucleus** | ***** | **3.1/2.7** | **8.0 (-28, -11, 3)/8.1 (28, -9, 3)** |
| **Third Ventricle** | ***** | **0.0/0.3** | **-999.0 (0, 0, 0)/7.3 (0, -9, 2)** |
| **Culmen** | ***** | **2.9/0.0** | **7.0 (-33, -40, -21)/-999.0 (0, 0, 0)** |
| ***** | ***** | **0.1/0.0** | **4.3 (-27, -37, -18)/-999.0 (0, 0, 0)** |
| **Fusiform Gyrus** | **20, 37** | **0.8/0.0** | **6.3 (-36, -40, -18)/-999.0 (0, 0, 0)** |
| **Angular Gyrus** | ***** | **0.4/0.0** | **6.1 (-43, -58, 32)/-999.0 (0, 0, 0)** |
| **Inferior Parietal Lobule** | ***** | **0.1/0.3** | **4.0 (-43, -48, 23)/6.0 (45, -48, 23)** |
| **Inferior Temporal Gyrus** | **20** | **0.3/0.0** | **5.7 (-39, -12, -30)/-999.0 (0, 0, 0)** |
| **Insula** | **13** | **0.0/0.1** | **-999.0 (0, 0, 0)/5.2 (48, -41, 20)** |
| **Sub-Gyral** | ***** | **0.6/0.4** | **4.2 (-27, -73, 24)/5.1 (42, -45, 23)** |
| **Cuneus** | ***** | **0.0/0.1** | **-999.0 (0, 0, 0)/4.9 (22, -79, 23)** |
| **Anterior Cingulate** | ***** | **0.0/0.1** | **-999.0 (0, 0, 0)/4.9 (13, 22, -4)** |
| **Pyramis** | ***** | **0.0/0.3** | **-999.0 (0, 0, 0)/4.8 (10, -83, -26)** |
| **Postcentral Gyrus** | **2, 3** | **0.1/0.9** | **3.8 (-62, -15, 24)/4.8 (45, -24, 40)** |
| **Middle Occipital Gyrus** | **19** | **0.2/0.0** | **4.4 (-40, -67, 3)/-999.0 (0, 0, 0)** |
| **Lingual Gyrus** | **18** | **0.1/0.1** | **4.4 (-22, -73, -3)/3.8 (30, -73, -4)** |
| **Declive** | ***** | **0.4/0.1** | **4.0 (-28, -55, -15)/4.2 (10, -84, -22)** |
| **Inferior Semi-Lunar Lobule** | ***** | **0.5/0.2** | **4.2 (-13, -73, -38)/4.1 (12, -75, -35)** |
| **Precentral Gyrus** | **4, 6** | **0.2/0.2** | **3.7 (-42, -14, 35)/4.1 (62, -9, 24)** |
| **Uvula** | ***** | **0.0/0.3** | **-999.0 (0, 0, 0)/4.1 (13, -86, -25)** |
| **Medial Frontal Gyrus** | **6** | **0.0/0.1** | **-999.0 (0, 0, 0)/4.1 (9, -9, 52)** |
| **Lateral Ventricle** | ***** | **0.1/0.1** | **3.8 (-13, 0, 22)/3.7 (15, 25, -1)** |
| **Precuneus** | ***** | **0.1/0.0** | **3.7 (-22, -59, 39)/-999.0 (0, 0, 0)** |
| **Cingulate Gyrus** | **31** | **0.0/0.1** | **-999.0 (0, 0, 0)/3.7 (13, -26, 39)** |

**ICGM9**

| **Area** | **Brodmann Area** | **volume (cc)** | **random effects: Max Value (x, y, z)** |
| --- | --- | --- | --- |
| **Middle Temporal Gyrus** | **19, 20, 39** | **2.2/1.3** | **7.7 (-56, -38, -8)/6.6 (50, -55, 0)** |
| **Inferior Temporal Gyrus** | **20, 37** | **0.4/0.4** | **7.5 (-40, -70, 1)/5.1 (48, -42, -16)** |
| **Middle Occipital Gyrus** | ***** | **1.2/0.1** | **7.1 (-36, -75, 15)/3.6 (43, -67, -4)** |
| **Culmen** | ***** | **6.3/3.6** | **7.0 (-33, -49, -18)/6.9 (34, -39, -27)** |
| **Sub-Gyral** | ***** | **1.0/0.3** | **6.6 (-40, -67, -2)/4.6 (37, -62, -10)** |
| **Fusiform Gyrus** | **20, 36, 37** | **1.1/1.7** | **6.3 (-36, -46, -18)/6.0 (40, -43, -18)** |
| **Cerebellar Tonsil** | ***** | **1.5/0.4** | **6.2 (-21, -57, -40)/4.8 (21, -59, -41)** |
| ***** | ***** | **0.5/0.1** | **5.5 (-34, -52, -13)/4.6 (36, -49, -16)** |
| **Declive** | ***** | **1.2/0.3** | **6.1 (-31, -55, -12)/4.0 (33, -56, -14)** |
| **Inferior Semi-Lunar Lobule** | ***** | **0.4/0.4** | **5.9 (-18, -60, -40)/5.2 (18, -62, -40)** |
| **Uncus** | **20, 28, 36, 38** | **0.6/0.1** | **5.3 (-25, -2, -38)/3.6 (24, 6, -20)** |
| **Tuber** | ***** | **1.2/0.0** | **5.2 (-45, -55, -25)/-999.0 (0, 0, 0)** |
| **Inferior Occipital Gyrus** | **17, 18** | **0.3/0.0** | **5.2 (-40, -67, -5)/-999.0 (0, 0, 0)** |
| **Thalamus** | ***** | **0.8/0.7** | **5.0 (-10, -14, 9)/4.5 (10, -14, 8)** |
| **Superior Temporal Gyrus** | **22, 38, 39, 41, 42** | **0.2/0.6** | **4.8 (-45, -60, 18)/5.0 (42, -56, 15)** |
| **Caudate** | ***** | **1.0/0.6** | **5.0 (-13, 11, 12)/4.6 (16, -5, 21)** |
| **Inferior Parietal Lobule** | **40** | **0.1/0.1** | **4.7 (-37, -55, 39)/4.6 (37, -35, 38)** |
| **Inferior Frontal Gyrus** | **13, 45, 47** | **0.2/0.4** | **4.6 (-22, 14, -21)/4.4 (42, 21, 4)** |
| **Insula** | **13** | **0.0/0.6** | **-999.0 (0, 0, 0)/4.6 (40, -27, 17)** |
| **Parahippocampal Gyrus** | **19** | **0.4/0.2** | **4.5 (-25, -30, -7)/4.2 (37, -34, -20)** |
| **Lingual Gyrus** | **17** | **0.5/0.1** | **4.4 (-7, -91, -7)/3.9 (16, -68, 0)** |
| **Anterior Cingulate** | **24, 32, 33** | **0.3/0.4** | **4.4 (-9, 41, 6)/4.4 (6, 31, 9)** |
| **Precuneus** | **7, 31** | **0.4/0.1** | **4.3 (-10, -45, 37)/3.6 (9, -48, 37)** |
| **Extra-Nuclear** | ***** | **0.2/0.0** | **4.1 (-15, -5, 20)/-999.0 (0, 0, 0)** |
| **Transverse Temporal Gyrus** | **41** | **0.0/0.1** | **-999.0 (0, 0, 0)/4.0 (50, -21, 12)** |
| **Supramarginal Gyrus** | ***** | **0.1/0.0** | **3.9 (-36, -52, 36)/-999.0 (0, 0, 0)** |
| **Cingulate Gyrus** | **31** | **0.1/0.1** | **3.7 (-7, -45, 40)/3.6 (9, -41, 34)** |
| **Cuneus** | ***** | **0.1/0.0** | **3.7 (-4, -93, 9)/-999.0 (0, 0, 0)** |
| **Paracentral Lobule** | **6** | **0.0/0.1** | **-999.0 (0, 0, 0)/3.5 (9, -29, 53)** |

**ICGM10**

| **Area** | **Brodmann Area** | **volume (cc)** | **random effects: Max Value (x, y, z)** |
| --- | --- | --- | --- |
| **Middle Temporal Gyrus** | **19, 21, 37, 39** | **3.0/4.1** | **7.7 (-45, -56, 25)/11.8 (43, -62, 5)** |
| **Superior Temporal Gyrus** | **22, 39** | **1.3/1.0** | **9.1 (-40, -56, 26)/5.0 (46, -54, 25)** |
| **Sub-Gyral** | ***** | **1.7/0.9** | **7.3 (-43, -54, -7)/8.7 (40, -61, 7)** |
| **Cerebellar Tonsil** | ***** | **1.9/1.3** | **8.4 (-12, -57, -41)/5.8 (4, -56, -41)** |
| **Inferior Temporal Gyrus** | **19, 20, 21, 37** | **0.8/0.7** | **6.3 (-53, -54, -6)/7.8 (43, -65, 2)** |
| ***** | ***** | **0.1/0.0** | **4.6 (-3, -79, -28)/-999.0 (0, 0, 0)** |
| **Thalamus** | ***** | **2.9/1.1** | **7.5 (-7, -16, 9)/6.5 (4, -11, 5)** |
| **Middle Occipital Gyrus** | **19** | **0.1/0.3** | **4.8 (-50, -57, -6)/7.4 (40, -65, 6)** |
| **Extra-Nuclear** | ***** | **1.7/1.4** | **5.0 (-15, 8, 13)/5.3 (15, 12, 5)** |
| **Lentiform Nucleus** | ***** | **3.2/2.7** | **6.4 (-25, 2, 3)/7.2 (28, -10, 3)** |
| **Inferior Semi-Lunar Lobule** | ***** | **2.8/1.5** | **7.2 (-9, -60, -41)/5.9 (10, -60, -42)** |
| **Caudate** | ***** | **2.4/2.2** | **6.1 (-12, 5, 14)/7.0 (13, 16, 3)** |
| **Cuneus** | **7, 18, 19, 23, 30** | **1.6/0.4** | **6.9 (-19, -82, 26)/5.6 (22, -83, 22)** |
| **Angular Gyrus** | **39** | **0.8/0.5** | **6.9 (-43, -60, 32)/4.4 (46, -64, 32)** |
| **Supramarginal Gyrus** | **40** | **0.9/0.4** | **6.8 (-43, -53, 27)/4.6 (48, -51, 27)** |
| **Uvula** | ***** | **0.9/0.4** | **6.2 (-9, -77, -33)/4.4 (24, -76, -26)** |
| **Inferior Parietal Lobule** | **39, 40** | **0.8/0.6** | **6.0 (-37, -30, 39)/5.7 (40, -56, 39)** |
| **Pyramis** | ***** | **2.0/0.7** | **6.0 (-6, -79, -30)/4.3 (36, -70, -31)** |
| **Third Ventricle** | ***** | **0.1/0.1** | **3.5 (-1, -17, 1)/5.9 (1, -9, 2)** |
| **Precuneus** | **19, 31, 39** | **0.7/0.2** | **5.7 (-22, -79, 27)/4.9 (15, -59, 38)** |
| **Culmen** | ***** | **2.0/1.7** | **5.3 (-33, -40, -22)/4.3 (34, -41, -26)** |
| **Tuber** | ***** | **0.6/0.4** | **5.1 (-30, -73, -29)/4.8 (28, -74, -28)** |
| **Fusiform Gyrus** | **20** | **0.4/0.1** | **5.0 (-43, -53, -11)/3.6 (56, -6, -26)** |
| **Pyramis of Vermis** | ***** | **0.1/0.0** | **4.9 (-3, -76, -30)/-999.0 (0, 0, 0)** |
| **Insula** | **13** | **0.1/0.1** | **4.6 (-45, -37, 21)/3.8 (37, -4, -1)** |
| **Postcentral Gyrus** | **2** | **0.3/0.1** | **4.5 (-45, -26, 37)/3.8 (39, -36, 58)** |
| **Declive** | ***** | **0.3/0.0** | **4.5 (-45, -52, -20)/-999.0 (0, 0, 0)** |
| **Middle Frontal Gyrus** | ***** | **0.1/0.0** | **4.4 (-33, -1, 43)/-999.0 (0, 0, 0)** |
| **Parahippocampal Gyrus** | ***** | **0.1/0.0** | **4.4 (-25, -38, 3)/-999.0 (0, 0, 0)** |
| **Superior Occipital Gyrus** | **39** | **0.1/0.0** | **3.8 (-33, -81, 32)/-999.0 (0, 0, 0)** |
| **Superior Parietal Lobule** | ***** | **0.0/0.1** | **-999.0 (0, 0, 0)/3.8 (30, -53, 45)** |
| **Cingulate Gyrus** | **31** | **0.1/0.0** | **3.7 (-9, -43, 35)/-999.0 (0, 0, 0)** |

**ICWM1**

| **Area** | **Brodmann Area** | **volume (cc)** | **random effects: Max Value (x, y, z)** |
| --- | --- | --- | --- |
| ***** | ***** | **0.1/0.1** | **4.1 (-65, -53, 14)/4.2 (64, -47, -14)** |
| **Inferior Temporal Gyrus** | **19, 20, 21, 37** | **3.1/3.5** | **9.9 (-53, -10, -31)/9.7 (40, -13, -31)** |
| **Superior Frontal Gyrus** | **8** | **0.0/0.8** | **-999.0 (0, 0, 0)/9.8 (39, 20, 49)** |
| **Middle Frontal Gyrus** | **6, 8** | **0.1/1.9** | **3.7 (-37, 16, 56)/8.5 (36, 20, 46)** |
| **Middle Temporal Gyrus** | **19, 20, 21, 22, 37, 38, 39** | **5.4/8.3** | **7.6 (-42, 1, -33)/8.2 (40, -3, -33)** |
| **Middle Occipital Gyrus** | **18, 19** | **0.0/2.0** | **-999.0 (0, 0, 0)/8.1 (34, -81, 15)** |
| **Supramarginal Gyrus** | **40** | **0.6/0.1** | **8.0 (-61, -42, 30)/3.6 (56, -55, 35)** |
| **Fusiform Gyrus** | **20, 36** | **2.0/1.0** | **7.8 (-56, -16, -26)/6.6 (40, -13, -26)** |
| **Uncus** | **20** | **0.1/0.2** | **4.9 (-37, -15, -28)/7.1 (37, -13, -28)** |
| **Sub-Gyral** | **20** | **1.7/2.2** | **5.8 (-45, -5, -21)/7.0 (27, -56, 40)** |
| **Inferior Parietal Lobule** | **40** | **0.5/0.2** | **6.8 (-64, -41, 27)/4.4 (49, -40, 45)** |
| **Cuneus** | **7, 18, 19** | **1.7/2.9** | **6.5 (-7, -75, 36)/6.1 (13, -89, 18)** |
| **Superior Temporal Gyrus** | **21, 22, 38** | **1.6/0.7** | **6.4 (-65, -50, 11)/5.6 (65, -4, -1)** |
| **Superior Parietal Lobule** | **7** | **0.5/0.7** | **5.6 (-30, -51, 55)/6.3 (27, -59, 43)** |
| **Precuneus** | **7, 31** | **2.9/2.2** | **6.0 (-13, -70, 27)/6.1 (24, -59, 40)** |
| **Postcentral Gyrus** | **2, 3, 5** | **1.0/0.2** | **5.5 (-64, -20, 29)/5.3 (31, -39, 67)** |
| **Precentral Gyrus** | **4** | **0.5/0.1** | **4.8 (-43, -15, 49)/4.5 (46, -14, 62)** |
| **Inferior Occipital Gyrus** | ***** | **0.0/0.1** | **-999.0 (0, 0, 0)/4.5 (39, -72, -3)** |
| **Angular Gyrus** | ***** | **0.0/0.1** | **-999.0 (0, 0, 0)/4.1 (33, -57, 35)** |
| **Inferior Frontal Gyrus** | **9** | **0.0/0.3** | **-999.0 (0, 0, 0)/4.0 (53, 14, 27)** |
| **Parahippocampal Gyrus** | **36** | **0.1/0.0** | **3.9 (-37, -22, -23)/-999.0 (0, 0, 0)** |
| **Extra-Nuclear** | ***** | **0.1/0.1** | **3.6 (-36, -5, 9)/3.9 (37, -3, 6)** |
| **Medial Frontal Gyrus** | ***** | **0.1/0.0** | **3.7 (-10, -7, 58)/-999.0 (0, 0, 0)** |
| **Lingual Gyrus** | ***** | **0.0/0.1** | **-999.0 (0, 0, 0)/3.6 (12, -89, -2)** |

**ICWM3**

| **Area** | **Brodmann Area** | **volume (cc)** | **random effects: Max Value (x, y, z)** |
| --- | --- | --- | --- |
| **Supramarginal Gyrus** | **40** | **1.3/1.9** | **5.8 (-49, -45, 31)/8.2 (56, -48, 34)** |
| ***** | ***** | **0.0/0.0** | **-999.0 (0, 0, 0)/-999.0 (0, 0, 0)** |
| **Cuneus** | **17, 18, 19, 23, 30** | **3.6/3.4** | **7.8 (-13, -71, 8)/7.1 (15, -67, 9)** |
| **Middle Temporal Gyrus** | **19, 20, 21, 37, 39** | **3.1/0.2** | **7.3 (-42, -77, 25)/4.2 (46, -71, 27)** |
| **Middle Frontal Gyrus** | **6, 8, 9, 11, 46** | **0.9/1.0** | **5.3 (-15, 48, -21)/7.2 (49, 34, 31)** |
| **Superior Frontal Gyrus** | **8, 9, 10, 11** | **3.6/4.2** | **6.3 (-13, 23, 46)/7.0 (22, 47, 32)** |
| **Inferior Parietal Lobule** | **7, 39, 40** | **2.6/3.1** | **6.0 (-31, -51, 55)/7.0 (43, -60, 44)** |
| **Sub-Gyral** | ***** | **3.1/0.6** | **7.0 (-34, -57, -6)/5.0 (27, -85, -2)** |
| **Lingual Gyrus** | **17, 18, 19** | **1.1/2.3** | **5.9 (-25, -93, -4)/6.6 (15, -84, 2)** |
| **Medial Frontal Gyrus** | **6, 9, 10, 11, 25** | **0.9/1.1** | **4.9 (-12, 37, 35)/6.3 (12, 3, 57)** |
| **Superior Parietal Lobule** | **7** | **0.9/0.3** | **6.0 (-31, -51, 48)/6.3 (42, -62, 49)** |
| **Superior Occipital Gyrus** | **19** | **0.4/0.0** | **6.2 (-45, -77, 27)/-999.0 (0, 0, 0)** |
| **Precuneus** | **7, 19, 31** | **1.2/0.2** | **6.1 (-13, -84, 39)/3.8 (25, -77, 43)** |
| **Inferior Occipital Gyrus** | **17, 18** | **1.4/0.1** | **6.0 (-34, -86, -2)/4.2 (30, -86, -5)** |
| **Cingulate Gyrus** | **9, 31, 32** | **0.5/2.2** | **5.3 (-7, -54, 26)/6.0 (10, 16, 36)** |
| **Posterior Cingulate** | **30, 31** | **0.2/0.8** | **4.5 (-9, -67, 10)/5.6 (18, -66, 12)** |
| **Angular Gyrus** | **39** | **0.4/0.0** | **5.5 (-43, -70, 30)/-999.0 (0, 0, 0)** |
| **Middle Occipital Gyrus** | **18, 19, 37** | **1.9/0.3** | **5.4 (-34, -86, 2)/4.5 (36, -84, 18)** |
| **Superior Temporal Gyrus** | **22, 39, 42** | **0.2/0.4** | **4.5 (-61, -53, 19)/5.1 (64, -47, 12)** |
| **Inferior Temporal Gyrus** | **20** | **0.6/0.1** | **5.1 (-58, -21, -20)/4.1 (50, -36, -18)** |
| **Uncus** | **20, 28, 36** | **0.3/0.0** | **5.0 (-28, -10, -30)/-999.0 (0, 0, 0)** |
| **Fusiform Gyrus** | ***** | **0.3/0.3** | **4.9 (-58, -19, -23)/4.5 (36, -50, -9)** |
| **Inferior Frontal Gyrus** | **11, 47** | **0.3/0.1** | **4.3 (-18, 37, -21)/3.9 (13, 37, -20)** |
| **Orbital Gyrus** | **11** | **0.2/0.1** | **4.0 (-10, 50, -21)/3.6 (13, 48, -23)** |
| **Anterior Cingulate** | ***** | **0.0/0.1** | **-999.0 (0, 0, 0)/3.7 (10, 32, 23)** |
| **Postcentral Gyrus** | ***** | **0.1/0.0** | **3.6 (-58, -16, 27)/-999.0 (0, 0, 0)** |

**ICWM4**

| **Area** | **Brodmann Area** | **volume (cc)** | **random effects: Max Value (x, y, z)** |
| --- | --- | --- | --- |
| **Postcentral Gyrus** | **2, 3, 7, 40** | **4.3/0.4** | **8.1 (-42, -27, 43)/4.2 (16, -48, 63)** |
| ***** | ***** | **0.0/0.0** | **-999.0 (0, 0, 0)/-999.0 (0, 0, 0)** |
| **Posterior Cingulate** | **23** | **0.4/0.4** | **7.0 (-4, -29, 22)/7.1 (4, -29, 22)** |
| **Extra-Nuclear** | ***** | **2.0/1.2** | **7.0 (-3, -25, 23)/6.3 (3, -31, 18)** |
| **Cingulate Gyrus** | **23, 24, 31, 32** | **7.8/2.9** | **6.8 (-12, 0, 37)/6.3 (3, -28, 26)** |
| **Sub-Gyral** | ***** | **6.0/0.3** | **6.8 (-34, -29, 41)/4.4 (33, -64, -6)** |
| **Inferior Parietal Lobule** | **2, 40** | **4.5/1.3** | **6.7 (-42, -30, 40)/5.9 (42, -49, 47)** |
| **Middle Frontal Gyrus** | **6, 8** | **2.0/0.6** | **6.4 (-36, 23, 43)/4.7 (27, 14, 46)** |
| **Supramarginal Gyrus** | **40** | **2.1/0.6** | **6.2 (-45, -42, 31)/5.1 (58, -48, 33)** |
| **Precuneus** | **7, 19, 31** | **0.6/0.4** | **6.2 (-12, -76, 45)/4.1 (13, -47, 41)** |
| **Precentral Gyrus** | **4** | **0.3/0.0** | **6.0 (-39, -24, 37)/-999.0 (0, 0, 0)** |
| **Superior Frontal Gyrus** | **8, 11** | **1.3/0.7** | **5.6 (-31, 60, -14)/5.2 (42, 17, 48)** |
| **Anterior Cingulate** | **24, 33** | **0.3/0.3** | **4.9 (-4, 16, 25)/5.0 (4, 17, 23)** |
| **Insula** | **13** | **0.3/0.0** | **4.4 (-42, -38, 21)/-999.0 (0, 0, 0)** |
| **Middle Temporal Gyrus** | **39** | **0.2/0.0** | **4.2 (-46, -74, 13)/-999.0 (0, 0, 0)** |
| **Fusiform Gyrus** | ***** | **0.0/0.1** | **-999.0 (0, 0, 0)/4.1 (45, -53, -11)** |
| **Paracentral Lobule** | **4** | **0.1/0.1** | **3.9 (-7, -38, 64)/4.0 (13, -32, 54)** |
| **Medial Frontal Gyrus** | **6** | **0.1/0.1** | **3.7 (-12, 45, 25)/3.9 (12, 4, 58)** |
| **Inferior Frontal Gyrus** | **47** | **0.0/0.1** | **-999.0 (0, 0, 0)/3.8 (37, 16, -10)** |
| **Superior Temporal Gyrus** | **13** | **0.2/0.0** | **3.7 (-49, -43, 21)/-999.0 (0, 0, 0)** |
| **Middle Occipital Gyrus** | ***** | **0.0/0.1** | **-999.0 (0, 0, 0)/3.7 (39, -88, 10)** |
| **Cerebellar Tonsil** | ***** | **0.0/0.1** | **-999.0 (0, 0, 0)/3.6 (50, -56, -35)** |

**ICWM5**

| **Area** | **Brodmann Area** | **volume (cc)** | **random effects: Max Value (x, y, z)** |
| --- | --- | --- | --- |
| **Cerebellar Tonsil** | ***** | **6.4/5.8** | **7.4 (-21, -57, -34)/6.8 (18, -61, -34)** |
| ***** | ***** | **3.3/2.7** | **7.0 (-21, -58, -30)/6.0 (18, -51, -30)** |
| **Pyramis** | ***** | **1.0/1.4** | **6.5 (-19, -64, -30)/6.0 (22, -61, -30)** |
| **Inferior Semi-Lunar Lobule** | ***** | **0.9/0.6** | **6.2 (-19, -64, -35)/5.3 (30, -64, -35)** |
| **Superior Frontal Gyrus** | **6, 8** | **0.4/0.3** | **5.2 (-10, -5, 67)/6.2 (37, 17, 50)** |
| **Uvula** | ***** | **0.3/0.8** | **4.7 (-16, -67, -34)/6.2 (15, -64, -33)** |
| **Middle Frontal Gyrus** | **6, 8, 9, 46** | **2.1/1.3** | **5.9 (-42, 12, 42)/5.5 (36, 17, 46)** |
| **Inferior Frontal Gyrus** | **45** | **0.1/0.4** | **4.4 (-49, 21, 21)/5.6 (52, 26, 19)** |
| **Culmen** | ***** | **0.6/0.8** | **5.1 (-24, -58, -26)/4.8 (10, -55, -22)** |
| **Nodule** | ***** | **0.1/0.3** | **5.1 (-15, -57, -29)/4.9 (13, -58, -29)** |
| **Inferior Parietal Lobule** | ***** | **0.0/0.4** | **-999.0 (0, 0, 0)/4.9 (33, -47, 56)** |
| **Middle Occipital Gyrus** | **19** | **0.1/0.0** | **4.8 (-50, -73, 1)/-999.0 (0, 0, 0)** |
| **Fastigium** | ***** | **0.3/0.3** | **4.7 (-7, -55, -20)/4.6 (7, -58, -22)** |
| **Sub-Gyral** | ***** | **0.1/0.1** | **4.7 (-45, 20, 21)/4.0 (45, 23, 18)** |
| **Medial Frontal Gyrus** | **6** | **0.1/0.0** | **4.6 (-13, -8, 67)/-999.0 (0, 0, 0)** |
| **Cuneus** | **19** | **0.0/0.1** | **-999.0 (0, 0, 0)/4.5 (28, -83, 33)** |
| **Postcentral Gyrus** | **5** | **0.0/0.1** | **-999.0 (0, 0, 0)/4.5 (36, -45, 59)** |
| **Supramarginal Gyrus** | ***** | **0.0/0.2** | **-999.0 (0, 0, 0)/4.5 (49, -43, 35)** |
| **Tuber** | ***** | **0.0/0.1** | **-999.0 (0, 0, 0)/4.2 (30, -58, -29)** |
| **Declive** | ***** | **0.0/0.2** | **-999.0 (0, 0, 0)/4.2 (15, -62, -22)** |
| **Precuneus** | **7** | **0.0/0.1** | **-999.0 (0, 0, 0)/3.9 (31, -47, 52)** |
| **Inferior Occipital Gyrus** | ***** | **0.1/0.0** | **3.8 (-37, -89, -2)/-999.0 (0, 0, 0)** |
| **Inferior Temporal Gyrus** | ***** | **0.1/0.0** | **3.8 (-48, -70, 1)/-999.0 (0, 0, 0)** |
| **Precentral Gyrus** | ***** | **0.1/0.0** | **3.8 (-34, -7, 58)/-999.0 (0, 0, 0)** |
| **Superior Parietal Lobule** | **7** | **0.0/0.1** | **-999.0 (0, 0, 0)/3.7 (33, -48, 60)** |
| **Angular Gyrus** | ***** | **0.0/0.1** | **-999.0 (0, 0, 0)/3.7 (49, -58, 35)** |
| **Superior Temporal Gyrus** | **39** | **0.1/0.0** | **3.6 (-56, -55, 28)/-999.0 (0, 0, 0)** |
| **Fusiform Gyrus** | ***** | **0.1/0.0** | **3.6 (-37, -19, -24)/-999.0 (0, 0, 0)** |

**ICWM7**

| **Area** | **Brodmann Area** | **volume (cc)** | **random effects: Max Value (x, y, z)** |
| --- | --- | --- | --- |
| **Middle Frontal Gyrus** | **8, 9, 10, 11, 46, 47** | **7.0/9.7** | **7.3 (-48, 22, 40)/8.2 (24, 60, 8)** |
| **Superior Frontal Gyrus** | **6, 8, 9, 10, 11** | **4.6/8.8** | **6.0 (-18, 61, 22)/7.2 (21, 60, 5)** |
| **Inferior Frontal Gyrus** | **10, 45, 46, 47** | **2.2/2.7** | **7.1 (-49, 40, 4)/7.1 (46, 44, -1)** |
| ***** | ***** | **0.0/0.0** | **-999.0 (0, 0, 0)/-999.0 (0, 0, 0)** |
| **Sub-Gyral** | **20** | **1.9/2.2** | **5.1 (-40, -20, -22)/6.1 (40, 42, 5)** |
| **Fusiform Gyrus** | **20, 36** | **0.3/0.0** | **6.1 (-40, -17, -24)/-999.0 (0, 0, 0)** |
| **Inferior Temporal Gyrus** | **20, 21, 37** | **0.9/0.3** | **6.1 (-59, -46, -15)/4.1 (39, -12, -30)** |
| **Middle Temporal Gyrus** | **20, 21, 37, 39** | **2.2/0.5** | **5.9 (-56, -37, -12)/4.5 (68, -32, -5)** |
| **Medial Frontal Gyrus** | **10, 11** | **0.7/0.6** | **4.6 (-12, 43, 10)/5.5 (18, 63, 5)** |
| **Cuneus** | **18, 19** | **1.4/0.0** | **5.0 (-7, -92, 16)/-999.0 (0, 0, 0)** |
| **Superior Temporal Gyrus** | **22, 39** | **0.4/0.4** | **4.3 (-45, -54, 22)/4.9 (64, -46, 12)** |
| **Middle Occipital Gyrus** | **18** | **0.4/0.0** | **4.7 (-10, -90, 16)/-999.0 (0, 0, 0)** |
| **Precentral Gyrus** | **9** | **0.1/0.1** | **4.6 (-45, 22, 36)/3.8 (43, 21, 35)** |
| **Uncus** | **20** | **0.1/0.0** | **4.4 (-40, -14, -27)/-999.0 (0, 0, 0)** |
| **Anterior Cingulate** | **10, 32** | **0.5/0.0** | **4.3 (-15, 44, 7)/-999.0 (0, 0, 0)** |
| **Inferior Occipital Gyrus** | **18** | **0.1/0.0** | **4.0 (-34, -83, -3)/-999.0 (0, 0, 0)** |
| **Precuneus** | ***** | **0.0/0.1** | **-999.0 (0, 0, 0)/3.8 (22, -56, 48)** |
| **Postcentral Gyrus** | **5, 40** | **0.1/0.1** | **3.7 (-30, -41, 63)/3.6 (56, -28, 50)** |
| **Lingual Gyrus** | ***** | **0.0/0.1** | **-999.0 (0, 0, 0)/3.7 (24, -68, 5)** |
| **Inferior Parietal Lobule** | **40** | **0.0/0.1** | **-999.0 (0, 0, 0)/3.6 (45, -60, 47)** |

**ICWM8**

| **Area** | **Brodmann Area** | **volume (cc)** | **random effects: Max Value (x, y, z)** |
| --- | --- | --- | --- |
| **Postcentral Gyrus** | **1, 2, 3, 4, 40** | **3.7/1.3** | **8.5 (-36, -31, 57)/6.2 (39, -32, 62)** |
| **Medial Frontal Gyrus** | **6, 8, 32** | **0.2/2.0** | **3.9 (-7, -14, 67)/8.2 (15, 7, 51)** |
| **Middle Frontal Gyrus** | **6, 8, 9, 46** | **3.4/2.7** | **6.9 (-24, 27, 46)/7.5 (48, 35, 34)** |
| **Precentral Gyrus** | **4, 6, 9** | **2.4/2.7** | **7.2 (-33, -29, 54)/6.2 (59, -17, 40)** |
| ***** | ***** | **0.1/0.3** | **4.4 (-53, 29, 34)/4.9 (16, -64, -25)** |
| **Superior Frontal Gyrus** | **6, 8, 9, 10, 11** | **1.7/4.9** | **5.7 (-27, 27, 48)/7.0 (18, 10, 51)** |
| **Sub-Gyral** | **6** | **0.8/2.6** | **4.3 (-28, -28, 47)/6.7 (15, 10, 53)** |
| **Uncus** | **20** | **0.1/0.0** | **5.9 (-40, -14, -27)/-999.0 (0, 0, 0)** |
| **Middle Temporal Gyrus** | **21** | **1.8/0.3** | **5.8 (-56, -51, 5)/3.8 (52, -44, -7)** |
| **Pyramis** | ***** | **0.0/1.0** | **-999.0 (0, 0, 0)/5.4 (16, -67, -27)** |
| **Supramarginal Gyrus** | **40** | **0.4/0.0** | **5.3 (-59, -44, 31)/-999.0 (0, 0, 0)** |
| **Inferior Parietal Lobule** | **2, 40** | **0.9/0.3** | **5.1 (-50, -47, 45)/5.2 (64, -31, 29)** |
| **Fusiform Gyrus** | **20** | **0.1/0.0** | **5.1 (-40, -17, -24)/-999.0 (0, 0, 0)** |
| **Inferior Frontal Gyrus** | **9, 44** | **0.0/0.6** | **-999.0 (0, 0, 0)/5.1 (64, 12, 15)** |
| **Precuneus** | **7, 19** | **0.4/0.1** | **5.1 (-22, -75, 42)/4.3 (10, -72, 44)** |
| **Uvula** | ***** | **0.0/0.4** | **-999.0 (0, 0, 0)/5.0 (13, -67, -24)** |
| **Middle Occipital Gyrus** | ***** | **0.0/0.1** | **-999.0 (0, 0, 0)/4.5 (49, -74, 0)** |
| **Inferior Temporal Gyrus** | **20** | **0.3/0.1** | **4.4 (-40, -12, -30)/3.6 (53, -29, -17)** |
| **Cingulate Gyrus** | **24, 32** | **0.6/0.1** | **4.2 (-9, 6, 38)/4.3 (18, 4, 45)** |
| **Declive** | ***** | **0.0/0.3** | **-999.0 (0, 0, 0)/4.0 (13, -64, -22)** |
| **Cerebellar Tonsil** | ***** | **0.0/0.1** | **-999.0 (0, 0, 0)/3.9 (21, -64, -32)** |
| **Nodule** | ***** | **0.0/0.1** | **-999.0 (0, 0, 0)/3.9 (10, -64, -25)** |
| **Superior Parietal Lobule** | **7** | **0.0/0.1** | **-999.0 (0, 0, 0)/3.9 (28, -64, 53)** |
| **Superior Temporal Gyrus** | **22, 39** | **0.1/0.1** | **3.8 (-53, -53, 11)/3.8 (62, -52, 16)** |
| **Culmen** | ***** | **0.0/0.1** | **-999.0 (0, 0, 0)/3.7 (21, -61, -25)** |

**ICWM9**

| **Area** | **Brodmann Area** | **volume (cc)** | **random effects: Max Value (x, y, z)** |
| --- | --- | --- | --- |
| **Sub-Gyral** | **7, 10, 40** | **1.9/0.3** | **9.4 (-27, -50, 56)/4.2 (52, -30, -10)** |
| **Superior Frontal Gyrus** | **6, 8, 9, 10, 11** | **0.6/1.9** | **5.0 (-12, 56, 22)/9.0 (33, 47, 28)** |
| **Inferior Frontal Gyrus** | **10, 45, 46, 47** | **5.2/1.7** | **8.9 (-45, 41, 5)/5.9 (55, 30, 15)** |
| **Superior Parietal Lobule** | **7** | **0.9/0.1** | **8.7 (-28, -52, 59)/3.6 (36, -49, 59)** |
| **Precuneus** | **7** | **0.8/0.0** | **7.7 (-27, -48, 51)/-999.0 (0, 0, 0)** |
| **Middle Frontal Gyrus** | **8, 9, 10, 11, 46, 47** | **1.9/0.8** | **7.0 (-48, 45, -4)/7.6 (30, 46, 25)** |
| **Inferior Parietal Lobule** | **40** | **0.4/0.4** | **6.7 (-30, -50, 54)/5.2 (55, -37, 41)** |
| ***** | ***** | **0.1/0.3** | **3.5 (-25, -47, -30)/4.0 (18, 66, -13)** |
| **Middle Temporal Gyrus** | **19, 21, 22, 37, 38, 39** | **2.9/1.1** | **6.6 (-50, -75, 18)/5.6 (61, -44, 4)** |
| **Fusiform Gyrus** | **20** | **0.1/0.6** | **4.0 (-55, -17, -23)/5.9 (56, -20, -23)** |
| **Middle Occipital Gyrus** | **18, 19** | **1.0/0.0** | **5.1 (-33, -88, 10)/-999.0 (0, 0, 0)** |
| **Inferior Temporal Gyrus** | **19, 20, 37** | **1.0/1.4** | **4.9 (-56, -21, -17)/5.1 (56, -23, -20)** |
| **Angular Gyrus** | ***** | **0.1/0.0** | **4.9 (-50, -59, 35)/-999.0 (0, 0, 0)** |
| **Superior Temporal Gyrus** | **22** | **0.1/0.1** | **4.8 (-59, -51, 21)/3.9 (62, -43, 8)** |
| **Postcentral Gyrus** | **5** | **0.1/0.0** | **4.7 (-10, -43, 64)/-999.0 (0, 0, 0)** |
| **Supramarginal Gyrus** | **40** | **0.2/0.4** | **4.3 (-59, -54, 23)/4.6 (55, -38, 36)** |
| **Cuneus** | **18** | **0.5/0.0** | **4.6 (-21, -96, 2)/-999.0 (0, 0, 0)** |
| **Cerebellar Tonsil** | ***** | **0.6/0.2** | **4.4 (-46, -60, -32)/3.9 (24, -44, -31)** |
| **Paracentral Lobule** | **5** | **0.1/0.0** | **4.3 (-16, -42, 57)/-999.0 (0, 0, 0)** |
| **Pyramis** | ***** | **0.1/0.0** | **4.1 (-46, -64, -31)/-999.0 (0, 0, 0)** |
| **Anterior Cingulate** | **10** | **0.0/0.1** | **-999.0 (0, 0, 0)/3.9 (10, 48, -2)** |
| **Lingual Gyrus** | ***** | **0.1/0.0** | **3.9 (-19, -96, -5)/-999.0 (0, 0, 0)** |
| **Medial Frontal Gyrus** | ***** | **0.2/0.1** | **3.8 (-9, 2, 61)/3.5 (13, 1, 54)** |

**ICWM10**

| **Area** | **Brodmann Area** | **volume (cc)** | **random effects: Max Value (x, y, z)** |
| --- | --- | --- | --- |
| **Inferior Parietal Lobule** | **7, 39, 40** | **5.6/5.0** | **7.3 (-42, -47, 41)/7.8 (43, -58, 42)** |
| **Superior Parietal Lobule** | **7** | **0.2/0.2** | **5.6 (-40, -59, 51)/7.1 (42, -60, 50)** |
| **Supramarginal Gyrus** | **40** | **1.7/1.6** | **5.8 (-39, -45, 35)/6.7 (43, -45, 37)** |
| **Angular Gyrus** | **39** | **0.3/0.7** | **4.4 (-36, -54, 36)/6.5 (43, -58, 36)** |
| ***** | ***** | **0.8/0.6** | **4.2 (-21, -55, -29)/4.0 (28, -51, -30)** |
| **Extra-Nuclear** | ***** | **2.8/2.0** | **6.1 (-1, -30, 21)/6.0 (3, -30, 21)** |
| **Posterior Cingulate** | **23** | **0.1/0.3** | **5.8 (-4, -28, 24)/6.0 (6, -28, 24)** |
| **Cingulate Gyrus** | **23, 24, 31, 32** | **2.8/3.3** | **5.4 (0, -19, 26)/6.0 (3, -23, 26)** |
| **Sub-Gyral** | ***** | **6.8/4.2** | **5.5 (-30, -59, 22)/5.0 (37, -46, 33)** |
| **Superior Temporal Gyrus** | **13, 22, 38, 39** | **1.8/1.3** | **4.7 (-37, -53, 22)/5.5 (45, -53, 12)** |
| **Cuneus** | **19** | **0.8/0.0** | **5.4 (-21, -87, 29)/-999.0 (0, 0, 0)** |
| **Lateral Ventricle** | ***** | **0.5/0.4** | **5.1 (-12, -36, 17)/4.7 (13, -36, 17)** |
| **Middle Temporal Gyrus** | **19, 21, 39** | **2.0/2.2** | **5.0 (-34, -56, 22)/4.9 (45, -51, 9)** |
| **Cerebellar Tonsil** | ***** | **1.7/2.7** | **4.3 (-22, -53, -31)/4.7 (31, -54, -36)** |
| **Middle Frontal Gyrus** | **10, 46** | **0.4/1.0** | **4.6 (-39, 47, 14)/4.7 (43, 42, 23)** |
| **Postcentral Gyrus** | **2, 3, 5** | **0.1/1.0** | **3.6 (-28, -30, 64)/4.7 (46, -29, 35)** |
| **Inferior Frontal Gyrus** | **13, 45, 47** | **0.0/0.2** | **-999.0 (0, 0, 0)/4.5 (37, 11, -12)** |
| **Superior Frontal Gyrus** | **10** | **0.3/0.1** | **4.3 (-13, 59, 18)/3.6 (39, 53, 14)** |
| **Insula** | **13** | **0.1/0.0** | **4.2 (-40, -41, 20)/-999.0 (0, 0, 0)** |
| **Precentral Gyrus** | **4** | **0.1/0.1** | **3.5 (-50, -11, 32)/4.1 (28, -29, 54)** |
| **Middle Occipital Gyrus** | ***** | **0.0/0.1** | **-999.0 (0, 0, 0)/4.1 (34, -68, 16)** |
| **Lingual Gyrus** | ***** | **0.1/0.1** | **4.0 (-15, -71, 5)/4.0 (18, -81, 3)** |
| **Precuneus** | **31, 39** | **0.1/0.1** | **3.8 (-39, -65, 35)/4.0 (21, -41, 30)** |
| **Pyramis** | ***** | **0.2/0.0** | **3.9 (-21, -60, -30)/-999.0 (0, 0, 0)** |
| **Inferior Semi-Lunar Lobule** | ***** | **0.1/0.0** | **3.7 (-18, -63, -35)/-999.0 (0, 0, 0)** |
| **Culmen** | ***** | **0.1/0.0** | **3.6 (-22, -58, -26)/-999.0 (0, 0, 0)** |
| **Uvula** | ***** | **0.1/0.0** | **3.5 (-16, -66, -32)/-999.0 (0, 0, 0)** |

**MEDIATION ANALYSIS**

| **Direct effects** | | | | | | | | | | | | | | | | | |
| --- | --- | --- | --- | --- | --- | --- | --- | --- | --- | --- | --- | --- | --- | --- | --- | --- | --- |
|  | | | | | | | | | | | | | | **95% Confidence Interval** | | | |
|  | |  | |  | | **Estimate** | | **Std. Error** | | **z-value** | | **p** | | **Lower** | | **Upper** | |
| CTQ-PhysAbuse |  | → |  | ZANaffectiveS |  | 0.061 |  | 0.296 |  | 0.205 |  | 0.838 |  | -0.519 |  | 0.641 |  |
| CTQ-EmotAbuse |  | → |  | ZANaffectiveS |  | -0.240 |  | 0.185 |  | -1.299 |  | 0.194 |  | -0.603 |  | 0.122 |  |
| CTQ-SexAbuse |  | → |  | ZANaffectiveS |  | 0.291 |  | 0.139 |  | 2.093 |  | 0.036 |  | 0.018 |  | 0.563 |  |
| CTQ-PhysNeglect |  | → |  | ZANaffectiveS |  | -0.191 |  | 0.288 |  | -0.661 |  | 0.509 |  | -0.756 |  | 0.375 |  |
| CTQ-EmotNeglect |  | → |  | ZANaffectiveS |  | 0.207 |  | 0.134 |  | 1.545 |  | 0.122 |  | -0.056 |  | 0.470 |  |
| CTQ-PhysAbuse |  | → |  | ZANcognS |  | 0.159 |  | 0.169 |  | 0.945 |  | 0.345 |  | -0.171 |  | 0.490 |  |
| CTQ-EmotAbuse |  | → |  | ZANcognS |  | 0.251 |  | 0.332 |  | 0.756 |  | 0.450 |  | -0.400 |  | 0.901 |  |
| CTQ-SexAbuse |  | → |  | ZANcognS |  | -0.012 |  | 0.133 |  | -0.090 |  | 0.928 |  | -0.273 |  | 0.249 |  |
| CTQ-PhysNeglect |  | → |  | ZANcognS |  | -0.065 |  | 0.277 |  | -0.234 |  | 0.815 |  | -0.609 |  | 0.479 |  |
| CTQ-EmotNeglect |  | → |  | ZANcognS |  | 0.059 |  | 0.063 |  | 0.937 |  | 0.349 |  | -0.064 |  | 0.182 |  |
| CTQ-PhysAbuse |  | → |  | ZANimpulsS |  | -0.127 |  | 0.162 |  | -0.783 |  | 0.433 |  | -0.445 |  | 0.191 |  |
| CTQ-EmotAbuse |  | → |  | ZANimpulsS |  | 0.253 |  | 0.217 |  | 1.166 |  | 0.244 |  | -0.172 |  | 0.678 |  |
| CTQ-SexAbuse |  | → |  | ZANimpulsS |  | 0.043 |  | 0.141 |  | 0.303 |  | 0.762 |  | -0.234 |  | 0.320 |  |
| CTQ-PhysNeglect |  | → |  | ZANimpulsS |  | 0.231 |  | 0.214 |  | 1.083 |  | 0.279 |  | -0.187 |  | 0.650 |  |
| CTQ-EmotNeglect |  | → |  | ZANimpulsS |  | 0.021 |  | 0.060 |  | 0.355 |  | 0.722 |  | -0.096 |  | 0.138 |  |
| CTQ-PhysAbuse |  | → |  | ZANinterpS |  | -0.352 |  | 0.182 |  | -1.934 |  | 0.053 |  | -0.708 |  | 0.005 |  |
| CTQ-EmotAbuse |  | → |  | ZANinterpS |  | 0.249 |  | 0.250 |  | 0.999 |  | 0.318 |  | -0.240 |  | 0.739 |  |
| CTQ-SexAbuse |  | → |  | ZANinterpS |  | 0.251 |  | 0.139 |  | 1.811 |  | 0.070 |  | -0.021 |  | 0.522 |  |
| CTQ-PhysNeglect |  | → |  | ZANinterpS |  | -0.509 |  | 0.144 |  | -3.540 |  | < .001 |  | -0.791 |  | -0.227 |  |
| CTQ-EmotNeglect |  | → |  | ZANinterpS |  | 0.119 |  | 0.098 |  | 1.214 |  | 0.225 |  | -0.073 |  | 0.312 |  |
|  | | | | | | | | | | | | | | | | | |
| Note.  Robust standard errors, robust confidence intervals, ML estimator. | | | | | | | | | | | | | | | | | |

| **Indirect effects** | | | | | | | | | | | | | | | | | | | | | |
| --- | --- | --- | --- | --- | --- | --- | --- | --- | --- | --- | --- | --- | --- | --- | --- | --- | --- | --- | --- | --- | --- |
|  | | | | | | | | | | | | | | | | | | **95% Confidence Interval** | | | |
|  | |  | |  | |  | |  | | **Estimate** | | **Std. Error** | | **z-value** | | **p** | | **Lower** | | **Upper** | |
| CTQ-PhysAbuse |  | → |  | ICGM2 |  | → |  | ZANaffectiveS |  | -0.242 |  | 0.174 |  | -1.389 |  | 0.165 |  | -0.584 |  | 0.100 |  |
| CTQ-PhysAbuse |  | → |  | ICGM6 |  | → |  | ZANaffectiveS |  | -0.167 |  | 0.195 |  | -0.857 |  | 0.392 |  | -0.548 |  | 0.215 |  |
| CTQ-PhysAbuse |  | → |  | ICWM2 |  | → |  | ZANaffectiveS |  | 0.236 |  | 0.174 |  | 1.360 |  | 0.174 |  | -0.104 |  | 0.577 |  |
| CTQ-PhysAbuse |  | → |  | ICWM6 |  | → |  | ZANaffectiveS |  | 0.129 |  | 0.137 |  | 0.936 |  | 0.349 |  | -0.141 |  | 0.398 |  |
| CTQ-EmotAbuse |  | → |  | ICGM2 |  | → |  | ZANaffectiveS |  | 0.169 |  | 0.175 |  | 0.969 |  | 0.333 |  | -0.173 |  | 0.512 |  |
| CTQ-EmotAbuse |  | → |  | ICGM6 |  | → |  | ZANaffectiveS |  | 0.117 |  | 0.151 |  | 0.774 |  | 0.439 |  | -0.179 |  | 0.413 |  |
| CTQ-EmotAbuse |  | → |  | ICWM2 |  | → |  | ZANaffectiveS |  | -0.116 |  | 0.134 |  | -0.870 |  | 0.384 |  | -0.378 |  | 0.146 |  |
| CTQ-EmotAbuse |  | → |  | ICWM6 |  | → |  | ZANaffectiveS |  | -0.021 |  | 0.056 |  | -0.370 |  | 0.712 |  | -0.131 |  | 0.090 |  |
| CTQ-SexAbuse |  | → |  | ICGM2 |  | → |  | ZANaffectiveS |  | -0.112 |  | 0.147 |  | -0.757 |  | 0.449 |  | -0.400 |  | 0.177 |  |
| CTQ-SexAbuse |  | → |  | ICGM6 |  | → |  | ZANaffectiveS |  | 0.061 |  | 0.085 |  | 0.711 |  | 0.477 |  | -0.107 |  | 0.228 |  |
| CTQ-SexAbuse |  | → |  | ICWM2 |  | → |  | ZANaffectiveS |  | -0.013 |  | 0.092 |  | -0.139 |  | 0.889 |  | -0.193 |  | 0.167 |  |
| CTQ-SexAbuse |  | → |  | ICWM6 |  | → |  | ZANaffectiveS |  | -0.095 |  | 0.102 |  | -0.926 |  | 0.355 |  | -0.295 |  | 0.106 |  |
| CTQ-PhysNeglect |  | → |  | ICGM2 |  | → |  | ZANaffectiveS |  | 0.400 |  | 0.247 |  | 1.620 |  | 0.105 |  | -0.084 |  | 0.884 |  |
| CTQ-PhysNeglect |  | → |  | ICGM6 |  | → |  | ZANaffectiveS |  | -0.181 |  | 0.222 |  | -0.818 |  | 0.413 |  | -0.616 |  | 0.253 |  |
| CTQ-PhysNeglect |  | → |  | ICWM2 |  | → |  | ZANaffectiveS |  | -0.147 |  | 0.122 |  | -1.204 |  | 0.229 |  | -0.386 |  | 0.092 |  |
| CTQ-PhysNeglect |  | → |  | ICWM6 |  | → |  | ZANaffectiveS |  | 0.212 |  | 0.194 |  | 1.090 |  | 0.276 |  | -0.169 |  | 0.592 |  |
| CTQ-EmotNeglect |  | → |  | ICGM2 |  | → |  | ZANaffectiveS |  | -0.222 |  | 0.114 |  | -1.940 |  | 0.052 |  | -0.445 |  | 0.002 |  |
| CTQ-EmotNeglect |  | → |  | ICGM6 |  | → |  | ZANaffectiveS |  | -0.005 |  | 0.031 |  | -0.157 |  | 0.875 |  | -0.066 |  | 0.056 |  |
| CTQ-EmotNeglect |  | → |  | ICWM2 |  | → |  | ZANaffectiveS |  | 0.114 |  | 0.090 |  | 1.276 |  | 0.202 |  | -0.061 |  | 0.290 |  |
| CTQ-EmotNeglect |  | → |  | ICWM6 |  | → |  | ZANaffectiveS |  | -0.012 |  | 0.043 |  | -0.270 |  | 0.787 |  | -0.095 |  | 0.072 |  |
| CTQ-PhysAbuse |  | → |  | ICGM2 |  | → |  | ZANcognS |  | -0.153 |  | 0.141 |  | -1.084 |  | 0.278 |  | -0.429 |  | 0.124 |  |
| CTQ-PhysAbuse |  | → |  | ICGM6 |  | → |  | ZANcognS |  | 0.179 |  | 0.167 |  | 1.074 |  | 0.283 |  | -0.148 |  | 0.506 |  |
| CTQ-PhysAbuse |  | → |  | ICWM2 |  | → |  | ZANcognS |  | 0.232 |  | 0.139 |  | 1.676 |  | 0.094 |  | -0.039 |  | 0.504 |  |
| CTQ-PhysAbuse |  | → |  | ICWM6 |  | → |  | ZANcognS |  | -0.148 |  | 0.164 |  | -0.900 |  | 0.368 |  | -0.469 |  | 0.174 |  |
| CTQ-EmotAbuse |  | → |  | ICGM2 |  | → |  | ZANcognS |  | 0.107 |  | 0.121 |  | 0.887 |  | 0.375 |  | -0.129 |  | 0.343 |  |
| CTQ-EmotAbuse |  | → |  | ICGM6 |  | → |  | ZANcognS |  | -0.126 |  | 0.091 |  | -1.389 |  | 0.165 |  | -0.303 |  | 0.052 |  |
| CTQ-EmotAbuse |  | → |  | ICWM2 |  | → |  | ZANcognS |  | -0.114 |  | 0.126 |  | -0.904 |  | 0.366 |  | -0.362 |  | 0.133 |  |
| CTQ-EmotAbuse |  | → |  | ICWM6 |  | → |  | ZANcognS |  | 0.024 |  | 0.056 |  | 0.424 |  | 0.672 |  | -0.087 |  | 0.134 |  |
| CTQ-SexAbuse |  | → |  | ICGM2 |  | → |  | ZANcognS |  | -0.070 |  | 0.107 |  | -0.659 |  | 0.510 |  | -0.280 |  | 0.139 |  |
| CTQ-SexAbuse |  | → |  | ICGM6 |  | → |  | ZANcognS |  | -0.065 |  | 0.078 |  | -0.838 |  | 0.402 |  | -0.218 |  | 0.087 |  |
| CTQ-SexAbuse |  | → |  | ICWM2 |  | → |  | ZANcognS |  | -0.013 |  | 0.090 |  | -0.140 |  | 0.889 |  | -0.189 |  | 0.163 |  |
| CTQ-SexAbuse |  | → |  | ICWM6 |  | → |  | ZANcognS |  | 0.109 |  | 0.124 |  | 0.877 |  | 0.380 |  | -0.134 |  | 0.352 |  |
| CTQ-PhysNeglect |  | → |  | ICGM2 |  | → |  | ZANcognS |  | 0.252 |  | 0.275 |  | 0.919 |  | 0.358 |  | -0.286 |  | 0.791 |  |
| CTQ-PhysNeglect |  | → |  | ICGM6 |  | → |  | ZANcognS |  | 0.195 |  | 0.147 |  | 1.329 |  | 0.184 |  | -0.092 |  | 0.482 |  |
| CTQ-PhysNeglect |  | → |  | ICWM2 |  | → |  | ZANcognS |  | -0.145 |  | 0.122 |  | -1.183 |  | 0.237 |  | -0.384 |  | 0.095 |  |
| CTQ-PhysNeglect |  | → |  | ICWM6 |  | → |  | ZANcognS |  | -0.243 |  | 0.151 |  | -1.612 |  | 0.107 |  | -0.539 |  | 0.053 |  |
| CTQ-EmotNeglect |  | → |  | ICGM2 |  | → |  | ZANcognS |  | -0.140 |  | 0.109 |  | -1.286 |  | 0.198 |  | -0.353 |  | 0.073 |  |
| CTQ-EmotNeglect |  | → |  | ICGM6 |  | → |  | ZANcognS |  | 0.005 |  | 0.033 |  | 0.160 |  | 0.873 |  | -0.059 |  | 0.070 |  |
| CTQ-EmotNeglect |  | → |  | ICWM2 |  | → |  | ZANcognS |  | 0.112 |  | 0.075 |  | 1.498 |  | 0.134 |  | -0.035 |  | 0.260 |  |
| CTQ-EmotNeglect |  | → |  | ICWM6 |  | → |  | ZANcognS |  | 0.013 |  | 0.051 |  | 0.259 |  | 0.795 |  | -0.087 |  | 0.114 |  |
| CTQ-PhysAbuse |  | → |  | ICGM2 |  | → |  | ZANimpulsS |  | -0.328 |  | 0.203 |  | -1.617 |  | 0.106 |  | -0.724 |  | 0.069 |  |
| CTQ-PhysAbuse |  | → |  | ICGM6 |  | → |  | ZANimpulsS |  | 0.122 |  | 0.148 |  | 0.822 |  | 0.411 |  | -0.169 |  | 0.413 |  |
| CTQ-PhysAbuse |  | → |  | ICWM2 |  | → |  | ZANimpulsS |  | 0.519 |  | 0.215 |  | 2.414 |  | 0.016 |  | 0.098 |  | 0.940 |  |
| CTQ-PhysAbuse |  | → |  | ICWM6 |  | → |  | ZANimpulsS |  | -0.174 |  | 0.173 |  | -1.006 |  | 0.314 |  | -0.513 |  | 0.165 |  |
| CTQ-EmotAbuse |  | → |  | ICGM2 |  | → |  | ZANimpulsS |  | 0.229 |  | 0.232 |  | 0.990 |  | 0.322 |  | -0.225 |  | 0.683 |  |
| CTQ-EmotAbuse |  | → |  | ICGM6 |  | → |  | ZANimpulsS |  | -0.086 |  | 0.088 |  | -0.969 |  | 0.333 |  | -0.259 |  | 0.088 |  |
| CTQ-EmotAbuse |  | → |  | ICWM2 |  | → |  | ZANimpulsS |  | -0.255 |  | 0.263 |  | -0.969 |  | 0.333 |  | -0.771 |  | 0.261 |  |
| CTQ-EmotAbuse |  | → |  | ICWM6 |  | → |  | ZANimpulsS |  | 0.028 |  | 0.066 |  | 0.424 |  | 0.672 |  | -0.102 |  | 0.158 |  |
| CTQ-SexAbuse |  | → |  | ICGM2 |  | → |  | ZANimpulsS |  | -0.151 |  | 0.197 |  | -0.766 |  | 0.444 |  | -0.537 |  | 0.235 |  |
| CTQ-SexAbuse |  | → |  | ICGM6 |  | → |  | ZANimpulsS |  | -0.044 |  | 0.066 |  | -0.669 |  | 0.503 |  | -0.174 |  | 0.086 |  |
| CTQ-SexAbuse |  | → |  | ICWM2 |  | → |  | ZANimpulsS |  | -0.028 |  | 0.200 |  | -0.140 |  | 0.889 |  | -0.421 |  | 0.365 |  |
| CTQ-SexAbuse |  | → |  | ICWM6 |  | → |  | ZANimpulsS |  | 0.128 |  | 0.138 |  | 0.927 |  | 0.354 |  | -0.143 |  | 0.399 |  |
| CTQ-PhysNeglect |  | → |  | ICGM2 |  | → |  | ZANimpulsS |  | 0.541 |  | 0.308 |  | 1.755 |  | 0.079 |  | -0.063 |  | 1.145 |  |
| CTQ-PhysNeglect |  | → |  | ICGM6 |  | → |  | ZANimpulsS |  | 0.133 |  | 0.145 |  | 0.915 |  | 0.360 |  | -0.152 |  | 0.417 |  |
| CTQ-PhysNeglect |  | → |  | ICWM2 |  | → |  | ZANimpulsS |  | -0.323 |  | 0.211 |  | -1.531 |  | 0.126 |  | -0.736 |  | 0.090 |  |
| CTQ-PhysNeglect |  | → |  | ICWM6 |  | → |  | ZANimpulsS |  | -0.286 |  | 0.168 |  | -1.707 |  | 0.088 |  | -0.615 |  | 0.043 |  |
| CTQ-EmotNeglect |  | → |  | ICGM2 |  | → |  | ZANimpulsS |  | -0.300 |  | 0.126 |  | -2.370 |  | 0.018 |  | -0.547 |  | -0.052 |  |
| CTQ-EmotNeglect |  | → |  | ICGM6 |  | → |  | ZANimpulsS |  | 0.004 |  | 0.022 |  | 0.161 |  | 0.872 |  | -0.040 |  | 0.047 |  |
| CTQ-EmotNeglect |  | → |  | ICWM2 |  | → |  | ZANimpulsS |  | 0.251 |  | 0.128 |  | 1.961 |  | 0.050 |  | 1.260e-4 |  | 0.502 |  |
| CTQ-EmotNeglect |  | → |  | ICWM6 |  | → |  | ZANimpulsS |  | 0.016 |  | 0.060 |  | 0.263 |  | 0.793 |  | -0.101 |  | 0.132 |  |
| CTQ-PhysAbuse |  | → |  | ICGM2 |  | → |  | ZANinterpS |  | -0.119 |  | 0.078 |  | -1.520 |  | 0.129 |  | -0.273 |  | 0.035 |  |
| CTQ-PhysAbuse |  | → |  | ICGM6 |  | → |  | ZANinterpS |  | 0.579 |  | 0.277 |  | 2.092 |  | 0.036 |  | 0.036 |  | 1.121 |  |
| CTQ-PhysAbuse |  | → |  | ICWM2 |  | → |  | ZANinterpS |  | 0.129 |  | 0.112 |  | 1.152 |  | 0.249 |  | -0.091 |  | 0.349 |  |
| CTQ-PhysAbuse |  | → |  | ICWM6 |  | → |  | ZANinterpS |  | -0.285 |  | 0.255 |  | -1.118 |  | 0.264 |  | -0.785 |  | 0.215 |  |
| CTQ-EmotAbuse |  | → |  | ICGM2 |  | → |  | ZANinterpS |  | 0.083 |  | 0.100 |  | 0.836 |  | 0.403 |  | -0.112 |  | 0.279 |  |
| CTQ-EmotAbuse |  | → |  | ICGM6 |  | → |  | ZANinterpS |  | -0.406 |  | 0.224 |  | -1.812 |  | 0.070 |  | -0.845 |  | 0.033 |  |
| CTQ-EmotAbuse |  | → |  | ICWM2 |  | → |  | ZANinterpS |  | -0.063 |  | 0.080 |  | -0.793 |  | 0.428 |  | -0.220 |  | 0.093 |  |
| CTQ-EmotAbuse |  | → |  | ICWM6 |  | → |  | ZANinterpS |  | 0.046 |  | 0.115 |  | 0.402 |  | 0.687 |  | -0.179 |  | 0.271 |  |
| CTQ-SexAbuse |  | → |  | ICGM2 |  | → |  | ZANinterpS |  | -0.055 |  | 0.082 |  | -0.666 |  | 0.505 |  | -0.216 |  | 0.107 |  |
| CTQ-SexAbuse |  | → |  | ICGM6 |  | → |  | ZANinterpS |  | -0.211 |  | 0.195 |  | -1.083 |  | 0.279 |  | -0.592 |  | 0.171 |  |
| CTQ-SexAbuse |  | → |  | ICWM2 |  | → |  | ZANinterpS |  | -0.007 |  | 0.049 |  | -0.141 |  | 0.887 |  | -0.104 |  | 0.090 |  |
| CTQ-SexAbuse |  | → |  | ICWM6 |  | → |  | ZANinterpS |  | 0.210 |  | 0.208 |  | 1.011 |  | 0.312 |  | -0.197 |  | 0.617 |  |
| CTQ-PhysNeglect |  | → |  | ICGM2 |  | → |  | ZANinterpS |  | 0.197 |  | 0.148 |  | 1.326 |  | 0.185 |  | -0.094 |  | 0.488 |  |
| CTQ-PhysNeglect |  | → |  | ICGM6 |  | → |  | ZANinterpS |  | 0.630 |  | 0.297 |  | 2.120 |  | 0.034 |  | 0.048 |  | 1.212 |  |
| CTQ-PhysNeglect |  | → |  | ICWM2 |  | → |  | ZANinterpS |  | -0.080 |  | 0.092 |  | -0.874 |  | 0.382 |  | -0.260 |  | 0.100 |  |
| CTQ-PhysNeglect |  | → |  | ICWM6 |  | → |  | ZANinterpS |  | -0.469 |  | 0.240 |  | -1.952 |  | 0.051 |  | -0.941 |  | 0.002 |  |
| CTQ-EmotNeglect |  | → |  | ICGM2 |  | → |  | ZANinterpS |  | -0.109 |  | 0.078 |  | -1.398 |  | 0.162 |  | -0.262 |  | 0.044 |  |
| CTQ-EmotNeglect |  | → |  | ICGM6 |  | → |  | ZANinterpS |  | 0.017 |  | 0.105 |  | 0.163 |  | 0.871 |  | -0.188 |  | 0.222 |  |
| CTQ-EmotNeglect |  | → |  | ICWM2 |  | → |  | ZANinterpS |  | 0.062 |  | 0.068 |  | 0.925 |  | 0.355 |  | -0.070 |  | 0.195 |  |
| CTQ-EmotNeglect |  | → |  | ICWM6 |  | → |  | ZANinterpS |  | 0.026 |  | 0.096 |  | 0.266 |  | 0.790 |  | -0.163 |  | 0.214 |  |
|  | | | | | | | | | | | | | | | | | | | | | |
| Note.  Robust standard errors, robust confidence intervals, ML estimator. | | | | | | | | | | | | | | | | | | | | | |

| **R-Squared** | | | |
| --- | --- | --- | --- |
|  | | **R²** | |
| ZANaffectiveS |  | 0.324 |  |
| ZANcognS |  | 0.306 |  |
| ZANimpulsS |  | 0.559 |  |
| ZANinterpS |  | 0.537 |  |
| ICGM2 |  | 0.431 |  |
| ICGM6 |  | 0.477 |  |
| ICWM2 |  | 0.314 |  |
| ICWM6 |  | 0.320 |  |
|  | | | |

**Path plot**


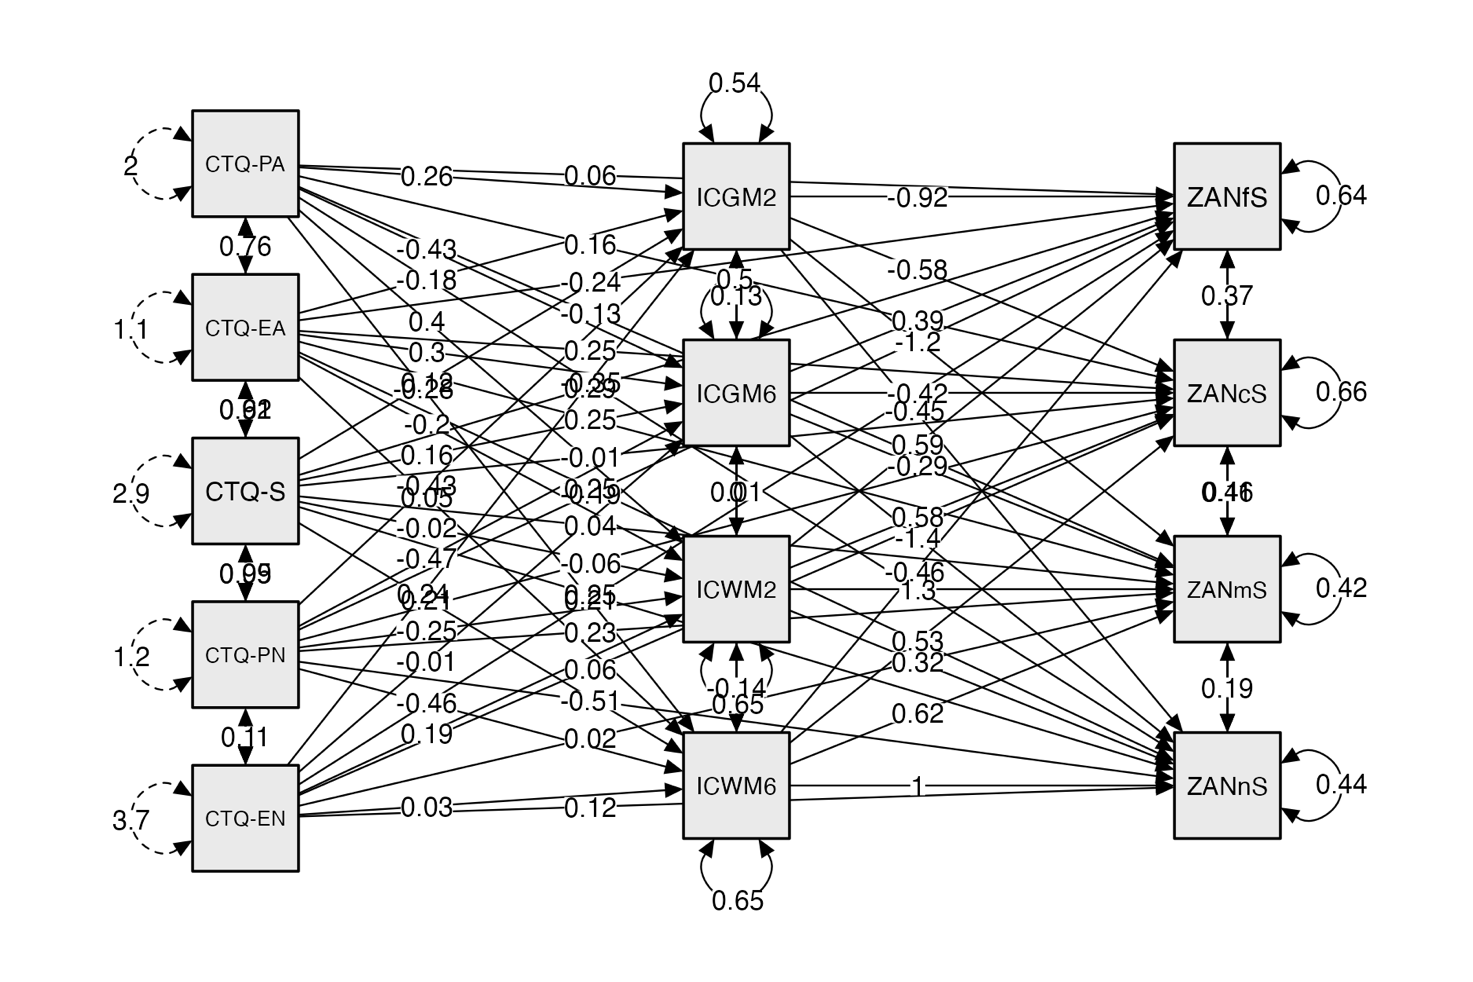

Supplement: Supplementary file 1 [file supplementary]
